# Supplementary material for: Facile Fabrication of Reduction-Responsive Supramolecular Nanoassemblies for Co-delivery of Doxorubicin and Sorafenib toward Hepatoma Cells
Source: PubMed Central journal article supplement (PMC5816960; doi:10.3389/fphar.2018.00061), 2018-02-06
Supplement: Presentation1.pdf [file Presentation1.pdf]

## *Supplementary Material*

# **Facile fabrication of reduction-responsive supramolecular nanoassemblies for co-delivery of doxorubicin and sorafenib towards hepatoma cells**

**Qingqing Xiong, Mangmang Cui, Ge Yu, Jian Wang\*, Tianqiang Song\***

\* **Correspondence:** Dr. Jian Wang: wangjian112358@163.com;

Dr. Tianqiang Song: tjchi@hotmail.com

## **1 Supplementary Methods**

### **Synthesis of $\beta$ -cyclodextrin-modified poly(ethylene glycol) (PEG-CD)**

Ethyl diamino- $\beta$ -cyclodextrin (EDA-CD) was synthesized according our previous report. PEG-CD was synthesized by the conjugation of PEG-NHS and EDA-CD according synthesis route displayed in Fig. S1A. Briefly, PEG-NHS (0.3 mmol, 0.6 g) and EDA-CD (0.45 mmol, 0.53 g) were co-dissolved in 0.01 M phosphate buffer saline (pH 4.4) and stirred at RT overnight. Then, the solution was dialyzed for 2 days against deionized water (MWCO 2000) and lyophilized to obtain white product (Yield 40.2%). As shown in Fig. S1B, the integration ratio of the peak at 3.33 ppm, corresponding to the terminated methyl protons of PEG (*signal a*), to the peak at 5.04 ppm, which was attributed to the C1-H of  $\beta$ -cyclodextrin (*signal C1-H*) was 3:7, which indicated that PEG-CD was synthesized successfully.

## 2 Supplementary Figures

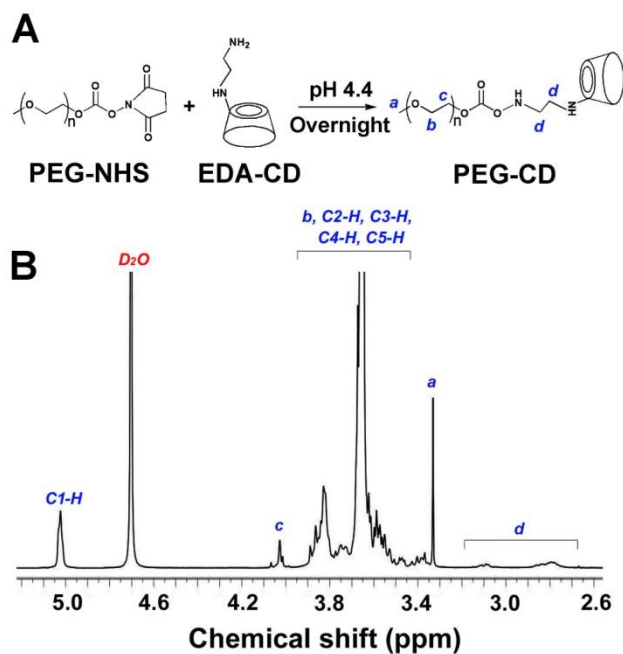

**Supplementary Figure 1.** Synthetic route (A) and  $^1\text{H}$  NMR spectra (B) of PEG-CD.

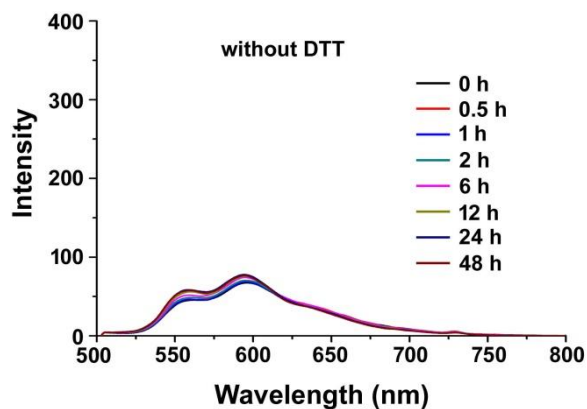

**Supplementary Figure 2.** Emission spectra of DOX in PEG-CD/AD nanomicelles solution without DTT at different time at an excitation wavelength of 485 nm.

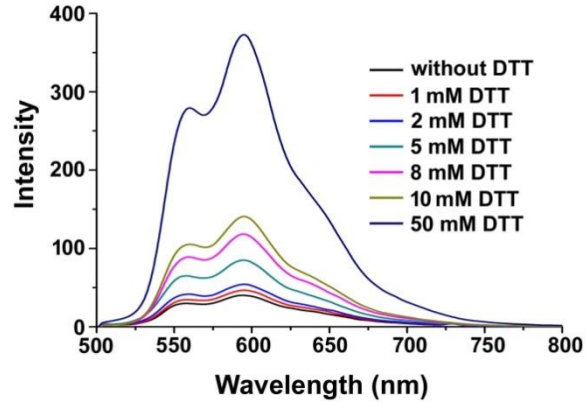

**Supplementary Figure 3.** Emission spectra of DOX in PEG-CD/AD nanomicelle solutions containing DTT of different concentrations at an excitation wavelength of 485 nm.

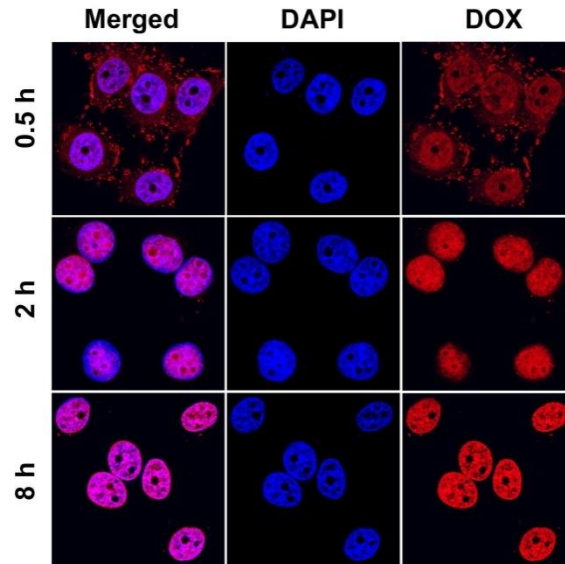

**Supplementary Figure 4.** Confocal images of the cells with the treatments of free DOX for different time.

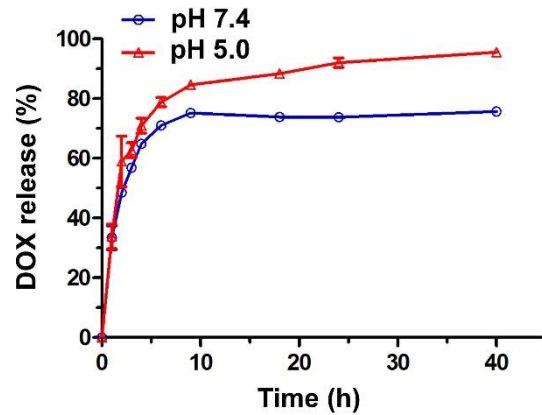

**Supplementary Figure 5.** *In vitro* release of free DOX in release media with different pHs. Data are means  $\pm$  standard deviation for three separate experiments.

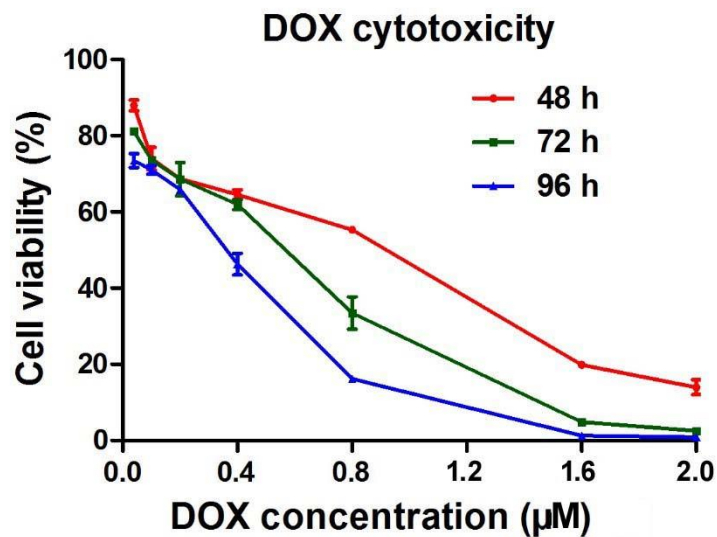

**Supplementary Figure 6.** *In vitro* cytotoxicity of HepG2 cells with the treatments of free DOX for different time. Data are means  $\pm$  standard deviation for three separate experiments.
